# Supplementary material for: Protocol Compliance Guiding Angiotensin II Use in Post Cardiovascular Surgery Vasoplegia
Source: PubMed Central journal article supplement — Crit Care Explor. 2022 May 13;4(5):e0687. doi: 10.1097/CCE.0000000000000687 (PMC9243243; doi:10.1097/cce.0000000000000687), 2022-05-13
Supplement: cc9-4-e0687-s001.pdf [file cc9-4-e0687-s001.pdf]

Supplemental Table 1: Emory Protocol Compliance Score

|                                                                             |                                                                    |           |
|-----------------------------------------------------------------------------|--------------------------------------------------------------------|-----------|
| NED Compliance (mcg/kg/min) <sup>a</sup>                                    |                                                                    |           |
|                                                                             | NED $\leq$ 0.3 at time of initiation of Ang II                     | 1         |
|                                                                             | NED 0.31 to 0.4 at time of initiation of Ang II                    | 2         |
|                                                                             | NED 0.41 to 0.5 at time of initiation of Ang II                    | 3         |
|                                                                             | NED $>$ 0.5 at time of initiation of Ang II                        | 4         |
|                                                                             | NED $<$ 0.1 at time of initiation of Ang II                        | 5         |
| Vasopressin Compliance (U/min)                                              |                                                                    |           |
|                                                                             | Vaso $\geq$ 0.06 at time of initiation of Ang II                   | 1         |
|                                                                             | Vaso not started or $<$ 0.06 at time of initiation of Ang II       | 2         |
| MB Compliance <sup>b</sup>                                                  |                                                                    |           |
|                                                                             | MB used after Vaso and before Ang II, or contraindicated           | 1         |
|                                                                             | MB not used after Vaso and before Ang II, and no contraindications | 2         |
| High Output Compliance (CI or ScvO <sub>2</sub> /CVP criteria) <sup>c</sup> |                                                                    |           |
|                                                                             | High output documented before Ang II started?                      | 1         |
|                                                                             | High output documented after Ang II started?                       | 2         |
|                                                                             | High output not documented?                                        | 3         |
|                                                                             | Low output documented?                                             | 4         |
| Cumulative Compliance Score                                                 |                                                                    |           |
|                                                                             | Compliant                                                          | 6 or less |
|                                                                             | Moderately Compliant                                               | 7-8       |
|                                                                             | Poorly Compliant                                                   | $>$ 8     |

The Emory Protocol cumulative compliance score is calculated by adding the scores for each category (NED compliance, vasopressin compliance, MB compliance and high output compliance). Scores may range from 4 to 13. A cumulative compliance score of 6 or less is considered compliant, 7-8 as moderately compliant, and greater than 8 as non-compliant.

<sup>a</sup>Compliance is graded as best score between start time and order time on Ang II.

<sup>b</sup>Contraindications to MB use include antecedent use of selective serotonin release uptake inhibitors, serotonin-norepinephrine release uptake inhibitors, or monoamine oxidase inhibitors, or documentation of G6PD deficiency. <sup>c</sup>High output is determined based on either a CI $>$ 2.3 or ScvO<sub>2</sub> $\geq$ 70% + CVP $>$  8 cm H<sub>2</sub>O. Ang II, angiotensin II; CI, cardiac index; CVP, central venous pressure; MB, methylene blue; mcg, micrograms; ScvO<sub>2</sub>, mixed venous oxygen saturation; kg, kilograms; min, minute; NED, norepinephrine equivalence dose; U, units; Vaso, vasopressin.

Supplemental Table 2: Regression Model A of Unbalanced Variables for ICU Mortality

| Variable                              | B      | 95% C.I.       | <i>P</i> |
|---------------------------------------|--------|----------------|----------|
| Serum Lactate prior to Ang II         | 0.089  | 0.943 to 1.453 | 0.24     |
| SOFA                                  | 0.180  | 0.987 to 1.127 | 0.07     |
| Use of Mechanical Circulatory Support | -0.468 | 0.168 to 2.336 | 0.49     |

|                             |        |                |       |
|-----------------------------|--------|----------------|-------|
| Cumulative Compliance Score | 0.446  | 1.061 to 2.300 | 0.02  |
| Cardiopulmonary Bypass Time | 0.006  | 0.998 to 1.015 | 0.13  |
| Chronic Lung Disease        | 0.977  | 0.709 to 9.949 | 0.15  |
| Constant                    | -8.076 |                | 0.000 |

ICU, intensive care unit; Ang II, angiotensin II; SOFA, Sequential Organ Failure Assessment. Use of mechanical support and presence of chronic lung disease were considered categorical variables, with the other variables treated as continuous.

Supplemental Table 3: Regression Model B of Known Predictors for Mortality and Cumulative Compliance Score Against ICU Mortality

| Variable                      | B      | 95% C.I.        | <i>P</i> |
|-------------------------------|--------|-----------------|----------|
| Serum Lactate prior to Ang II | 0.133  | 1.000 to 1.304  | 0.05     |
| SOFA Score                    | 0.150  | 0.974 to 1.386  | 0.10     |
| Cumulative Compliance score   | 0.388  | 1.045 to 2.081  | 0.03     |
| NE Dose at start of Ang II    | -0.045 | 0.021 to 44.248 | 0.98     |
| Constant                      | -5.715 |                 | 0.001    |

ICU, intensive care unit; Ang II, angiotensin II; SOFA, Sequential Organ Failure Assessment; NE, norepinephrine equivalence. All variables were treated as continuous.

Supplemental Table 4: Regression Model C of Statistically significant Variables from Model A and B

| Variable                      | B      | 95% C.I.       | <i>P</i> |
|-------------------------------|--------|----------------|----------|
| SOFA                          | 0.182  | 0.988 to 1.455 | 0.07     |
| Cumulative Compliance Score   | 0.443  | 1.065 to 2.278 | 0.02     |
| Cardiopulmonary Bypass Time   | 0.007  | 0.999 to 1.015 | 0.08     |
| Chronic Lung Disease          | 0.942  | 0.679 to 9.679 | 0.17     |
| Serum Lactate prior to Ang II | 0.091  | 0.944 to 1.269 | 0.23     |
| Constant                      | -8.407 |                | 0.000    |

SOFA, Sequential Organ Failure Assessment. Both variables treated as continuous.

Supplemental Table 5: Regression of Individual Compliance Scores for ICU Mortality

| Variable                        | B      | 95% C.I.       | <i>P</i> |
|---------------------------------|--------|----------------|----------|
| NE Dose Compliance Score        | 0.024  | 0.655 to 1.601 | 0.92     |
| Vaso Dose Compliance Score      | -1.735 | 0.024 to 1.300 | 0.09     |
| Cardiac Output Compliance Score | 0.713  | 1.205 to 3.454 | 0.008    |
| MB Compliance Score             | -0.282 | 0.252 to 2.255 | 0.61     |
| Constant                        | -0.545 |                | 0.64     |

ICU, intensive care unit; NE, norepinephrine equivalence; Vaso, vasopressin. Vaso Dose Compliance Score was considered a categorical variable, with the other two variables treated as continuous.
